# Supplementary material for: Gradual Return to Work in Germany: Protocol of a Qualitative Study to Examine Current Practices
Source: Research Square preprint supplement (doi:10.21203/rs.3.rs-482611/v1), 2021-05-04
Supplement: Supplementary file 2 [file 98db36d551010fd54e76bd39.docx]

**Group Discussion: Short questionnaire for organisational stakeholders and experts**

| 1. | *You are…* | male  female  other |
| --- | --- | --- |
| 2. | *When were you born?*  *Please enter the month and year of your birth.* | Month: _________ Year: _____ |
| 3. | *What is your position in the company?* | Job title:  _________________________________  Fields of activity:  _________________________________ |
| 4. | *How long have you been working in the company?* | less than 5 years  5-10 years  more than 10 years |
| 5. | *How do you rate your experience with operational reintegration on a scale from 0 to 10?* | 0 1 2 3 4 5 6 7 8 9 10  no very  experience experienced |
| 6. | *How important is GRTW for a successful return to work on a scale from 0 to 10?* | 0 1 2 3 4 5 6 7 8 9 10  completely very  unimportant important |
