# Supplementary material for: Gradual Return to Work in Germany: Protocol of a Qualitative Study to Examine Current Practices
Source: Research Square preprint supplement (doi:10.21203/rs.3.rs-482611/v1), 2021-05-04
Supplement: Supplementary file 2 [file 3670333ac67b2a1668745a1b.docx]

**Interview t2: Short questionnaire for returning employees**

Symbol:______________

|  |  |  | |
| --- | --- | --- | --- |
| 1. | *How would you describe your current health status?* | very good  rather good  average  rather bad  very bad | |
| 2. | *How do you assess your current ability to work in relation to the physical work requirements?* | very good  rather good  average  rather bad  very bad | |
| 3. | *How do you assess your current ability to work in relation to the psychological work requirements?* | very good  rather good  average  rather bad  very bad | |
| 4. | *Based on your current health status, do you think that you will be able to carry out your current job for the next two years?* | unlikely  not sure  sure | |
| 5. | *How important is Gradual return to work for a successful return to work on a scale from 0 to 10?* | | 0 1 2 3 4 5 6 7 8 9 10  completey very unimportant important |
| 6. | *If I resume my work fully tomorrow in my current health situation. I expect that...* | | |
|  |  | | totally  disagree  1 2 | 3 | 4 | totally  agree  about  5 6 | | --- | --- | --- | --- | | |
| a. | *…I will be able to cope with setbacks.* |  | |
| b. | *…I won‘t be able to complete my work tasks due to my emotional state.* |  | |
| c. | *…* *I will be able to set my personal boundaries at work.* |  | |
| d. | *…I will be able to perform my tasks at work.* |  | |
| e. | *…I will be able to deal with emotionally demanding situations.* |  | |
| f. | *…I will have no energy left to do anything else.* |  | |
| g. | *…I will be able to concentrate on my work.* |  | |
| h. | *…I will be able to cope with work pressure.* |  | |
| i. | *…I won‘t be able to handle potential problems at work.* |  | |
| j. | *…I can motivate myself to perform my job.* |  | |
| k. | *…I can deal with the physical demands of my work.* |  | |
